# Supplementary material for: Phenome risk classification enables phenotypic imputation and gene discovery in developmental stuttering
Source: PubMed Central journal article supplement — Am J Hum Genet. 2021 Dec 2;108(12):2271–83. doi: 10.1016/j.ajhg.2021.11.004 (PMC8715184; doi:10.1016/j.ajhg.2021.11.004), 2021-12-02
Supplement: mmc1.pdf [file mmc1.pdf]

**The American Journal of Human Genetics, Volume 108**

**Supplemental information**

**Phenome risk classification enables  
phenotypic imputation and gene discovery  
in developmental stuttering**

**Douglas M. Shaw, Hannah P. Polikowsky, Dillon G. Pruett, Hung-Hsin Chen, Lauren E. Petty, Kathryn Z. Viljoen, Janet M. Beilby, Robin M. Jones, Shelly Jo Kraft, and Jennifer E. Below**

## Supplemental Figures

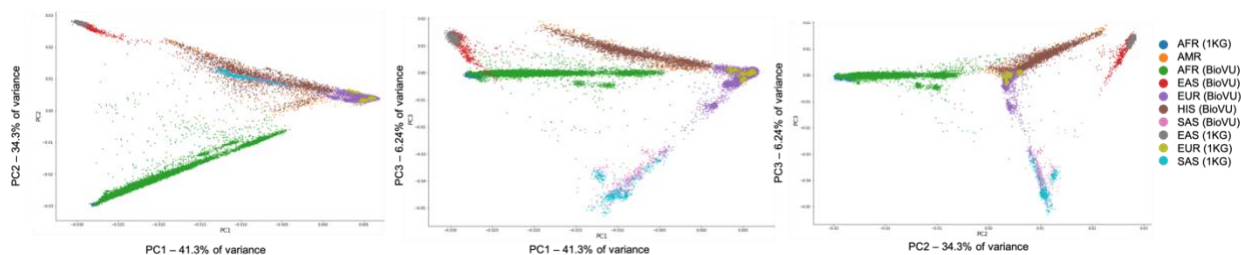

**Figure S1. Principal component analysis of BioVU patients results.** Top three principal components for all subjects in BioVU projected onto 1KG reference data. Broad ancestry groups were stratified into either African (AFR), European (EUR), Hispanic (HIS), South East Asian (SAS), East Asian (EAS) ancestry, or admixed Americans (AMR) based on PCs 1-3 (see methods). EUR ancestry was stratified

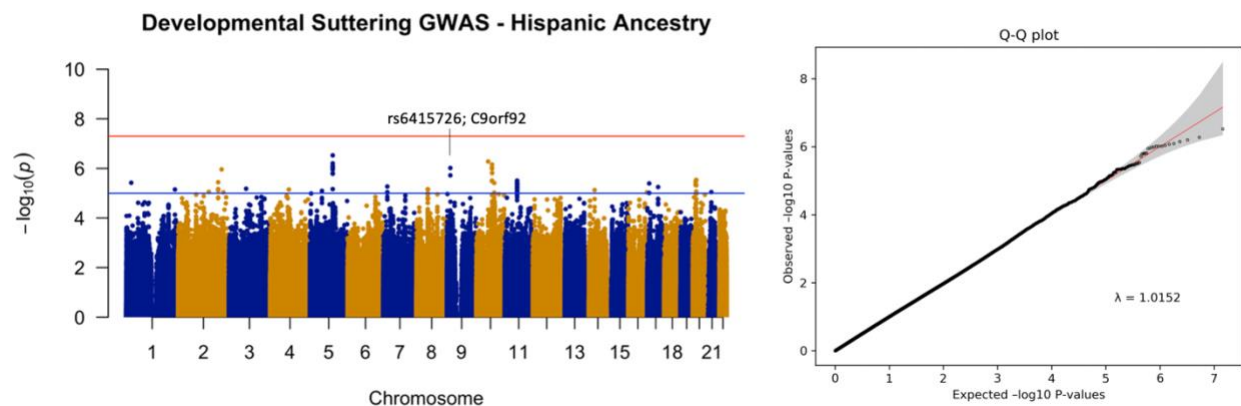

**Figure S2. Manhattan and qq-plot of Hispanic ancestry PheML predicted developmental stuttering GWAS results.** Analysis included 8,147,169 autosomal variants. No variants reached genome-wide significance ( $P < 5 \times 10^{-8}$ ). Red line indicates genome-wide significance threshold ( $5.0 \times 10^{-8}$ ), blue line indicates suggestive significance threshold ( $1.0 \times 10^{-5}$ ). Loci reported on table 2 are labeled on plot.

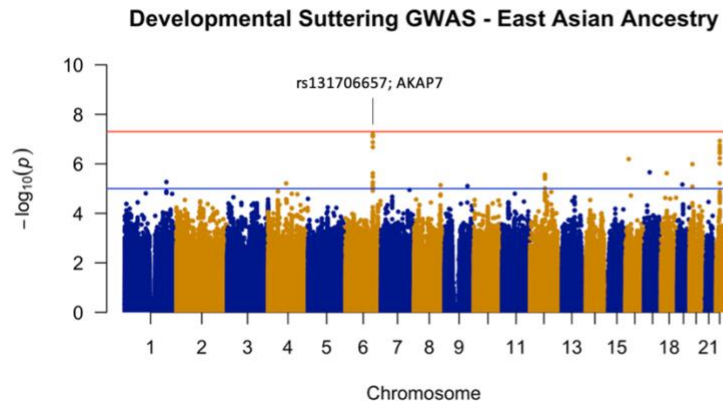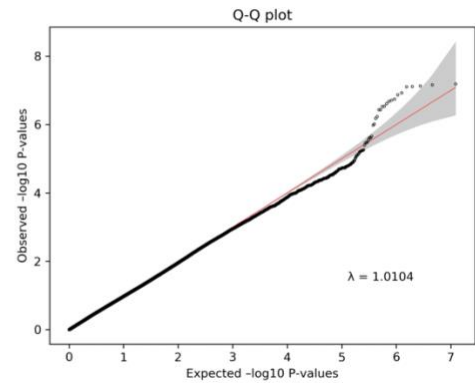

**Figure S3. Manhattan and qq-plot of East Asian ancestry PheML predicted developmental stuttering GWAS results.** Analysis included 6,922,517 autosomal variants. No variants reached genome-wide significance ( $P < 5 \cdot 10^{-8}$ ). Red line indicates genome-wide significance threshold ( $5.0 \cdot 10^{-8}$ ), blue line indicates suggestive significance threshold ( $1.0 \cdot 10^{-5}$ ). Loci reported on table 2 are labeled on plot.

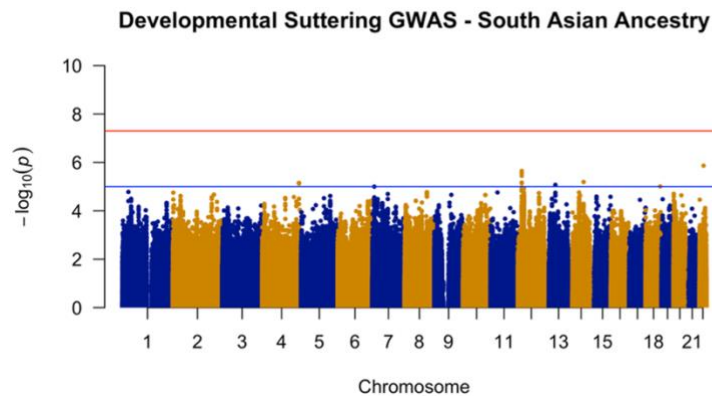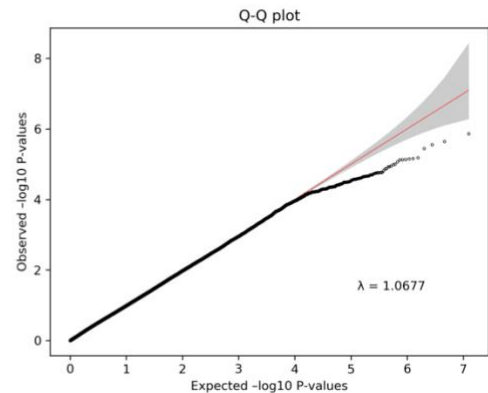

**Figure S4. Manhattan and qq-plot of South Asian PheML predicted developmental stuttering GWAS results.** Analysis included 7,058,354 autosomal variants. No variants reached genome-wide significance ( $P < 5 \cdot 10^{-8}$ ). Red line indicates genome-wide significance threshold ( $5.0 \cdot 10^{-8}$ ), blue line indicates suggestive significance threshold ( $1.0 \cdot 10^{-5}$ ). Only 51 subjects of SAS ancestry were predicted by the PheML model to have developmental stuttering.

### PheML Predicted Developmental Stuttering GWAS - African Ancestry

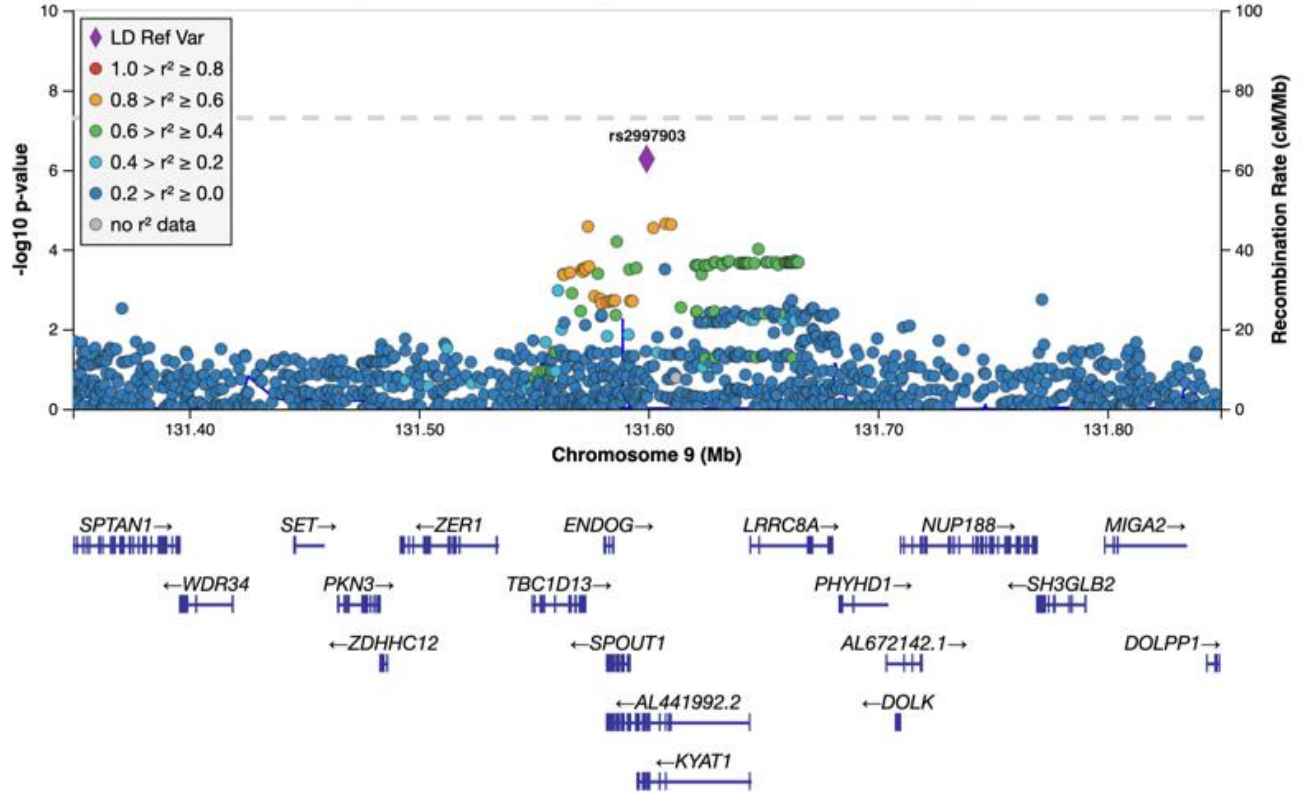

**Figure S5. LocusZoom Plot for rs2997903 in AFR PheML Stuttering GWAS.** Lead variant found within the first intron of *KYAT1* ( $\beta=0.308$ ;  $P=5.32 \times 10^{-7}$ ). Dashed line indicates genome-wide significance threshold ( $5.0 \times 10^{-8}$ ).

### PheML Predicted Developmental Stuttering GWAS - African Ancestry

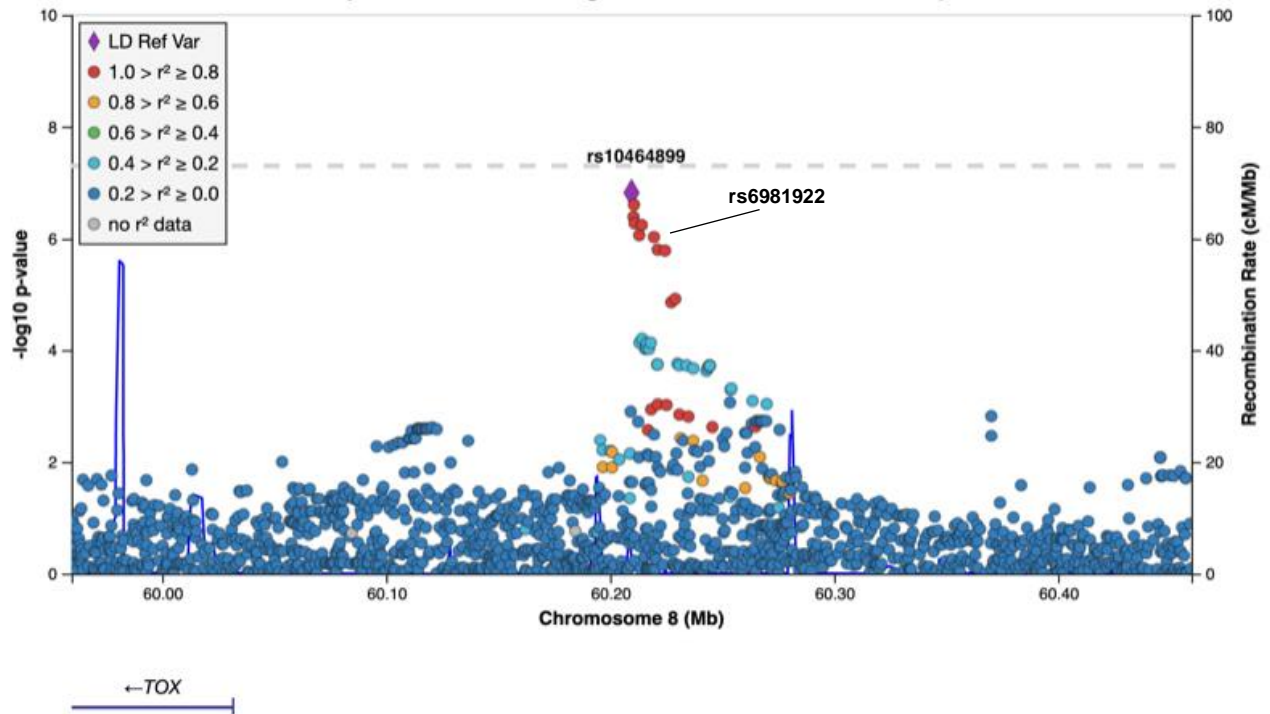

**Figure S6. LocusZoom Plot for rs10464899 in AFR PheML Stuttering GWAS.** Lead variant found 178kb 5' of *TOX* (beta=0.216;  $P=1.51 \times 10^{-7}$ ). We also reported rs6981922 (beta=0.197;  $P=9.35 \times 10^{-7}$ ) which replicated in our East Asian population as well ( $P=3.27 \times 10^{-2}$ ). Dashed line indicates genome-wide significance threshold ( $5.0 \times 10^{-8}$ ).

### PheML Predicted Developmental Stuttering GWAS - African Ancestry

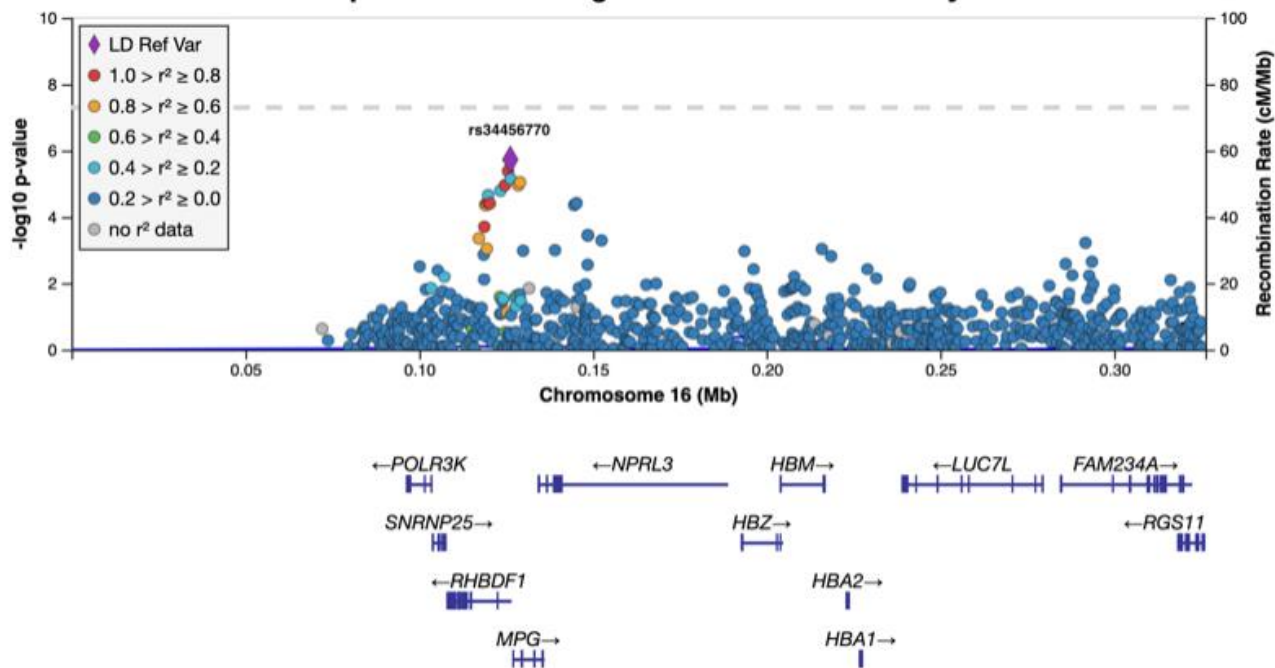

**Figure S7. LocusZoom Plot for rs34456770 in AFR PheML Stuttering GWAS.** Lead variant found 797bp 5' of *MPG* ( $\beta=0.256$ ;  $P=1.87 \times 10^{-6}$ ). Dashed line indicates genome-wide significance threshold ( $5.0 \times 10^{-8}$ ).

### PheML Predicted Developmental Stuttering GWAS - African Ancestry

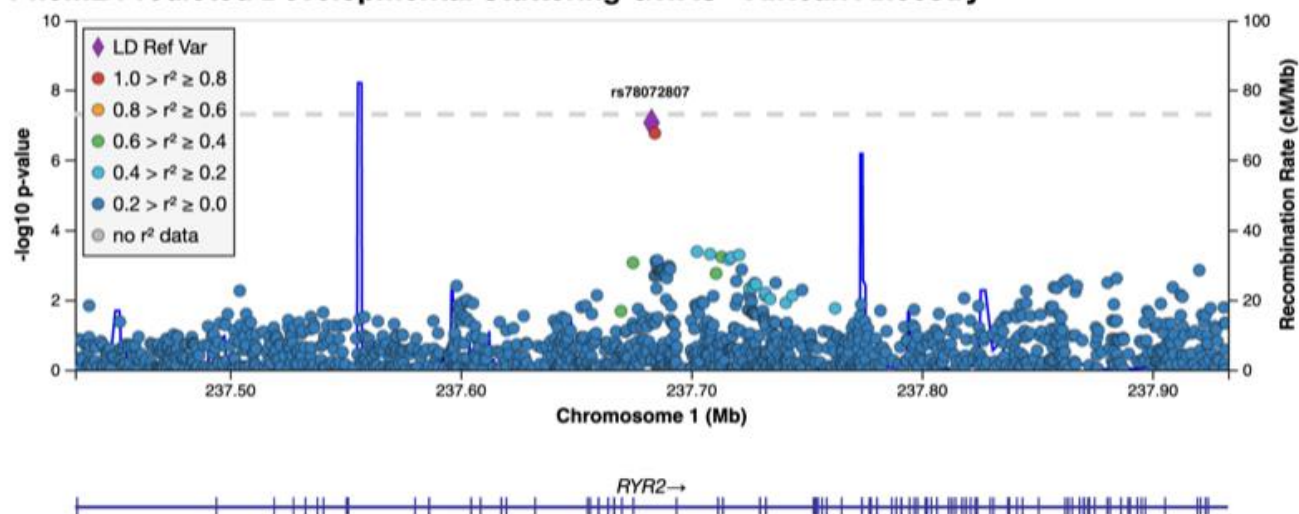

**Figure S8. LocusZoom Plot for rs78072807 in AFR PheML Stuttering GWAS.** Lead variant found within the 21st intron of *RYR2* ( $\beta=0.371$ ;  $P=8.73 \times 10^{-8}$ ). Dashed line indicates genome-wide significance threshold ( $5.0 \times 10^{-8}$ ).

### PheML Predicted Developmental Stuttering GWAS - African Ancestry

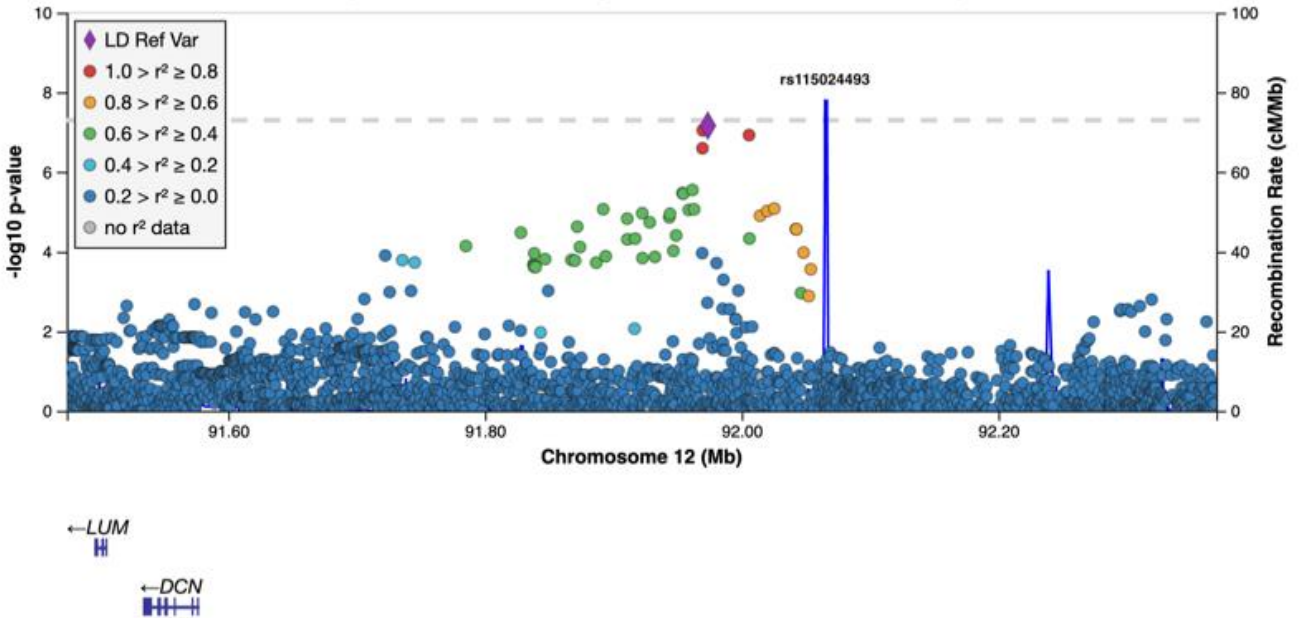

**Figure S9. LocusZoom Plot for rs115024493 in AFR PheML Stuttering GWAS.** Lead variant found 397kb 5' of *DCN* ( $\beta=0.376$ ;  $P=6.58 \times 10^{-8}$ ). Dashed line indicates genome-wide significance threshold ( $5.0 \times 10^{-8}$ ).

### PheML Predicted Developmental Stuttering GWAS - East Asian Ancestry

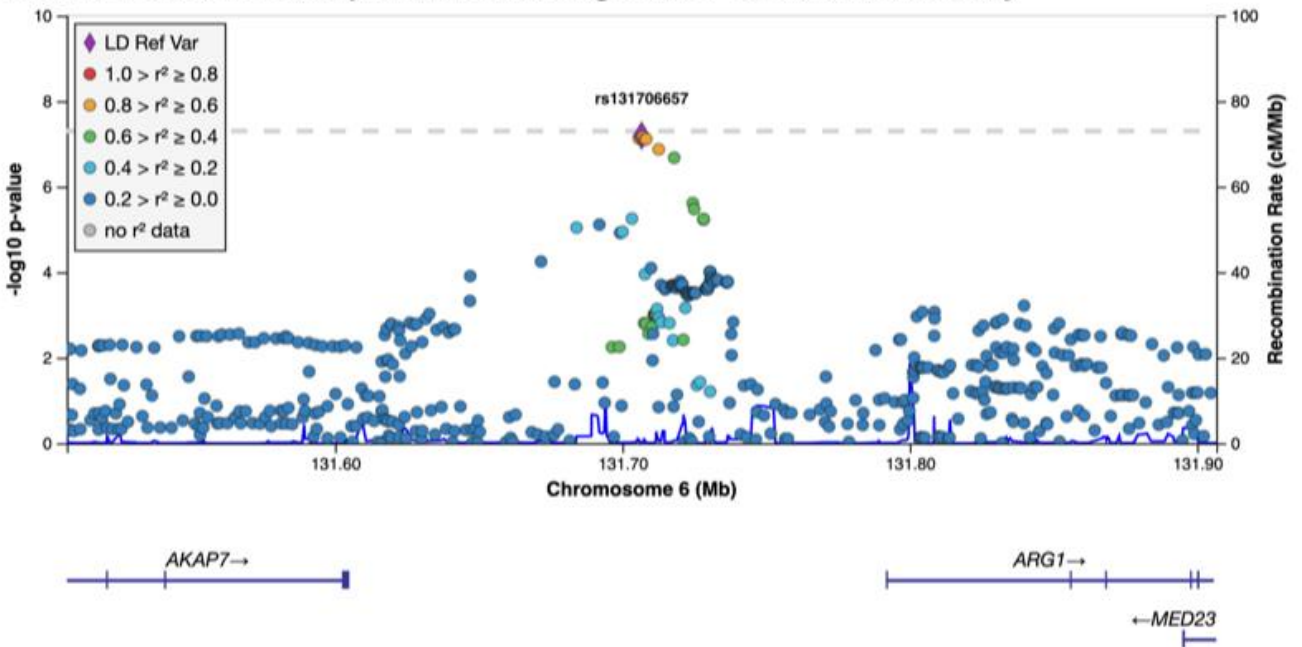

**Figure S10. LocusZoom Plot for rs10872381 in EAS PheML Stuttering GWAS.** Lead variant found 102kb 3' of *AKAP7* ( $\beta=0.803$ ;  $P=6.38 \times 10^{-8}$ ). Dashed line indicates genome-wide significance threshold ( $5.0 \times 10^{-8}$ ).

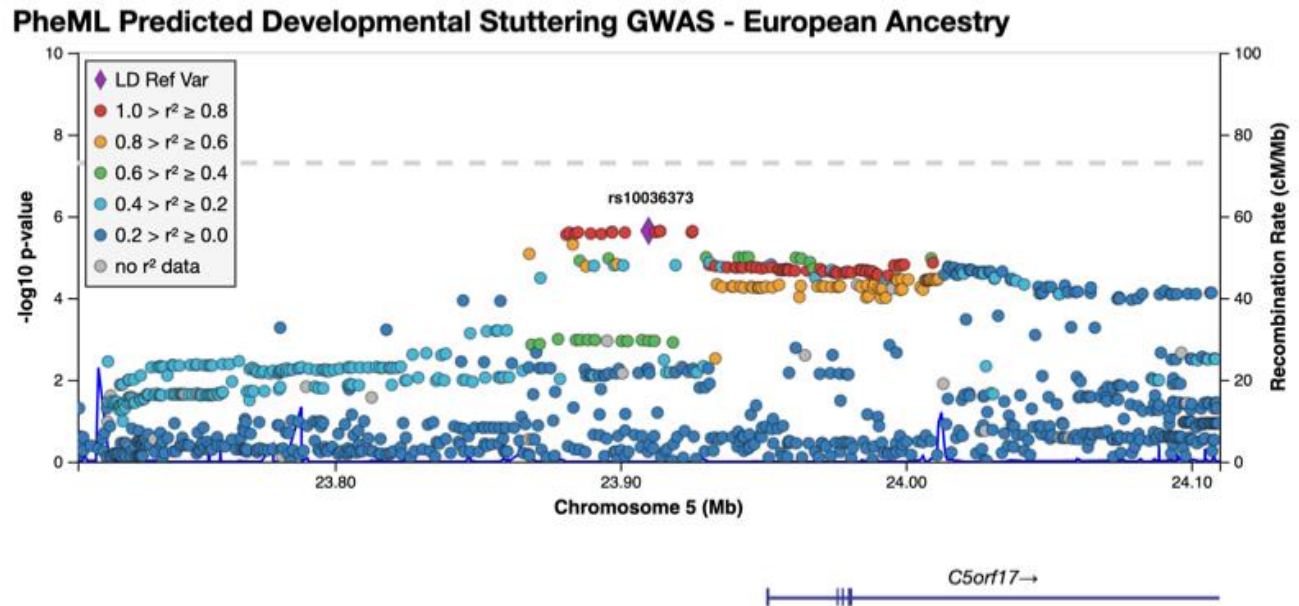

**Figure S11. LocusZoom Plot for rs10036373 in EUR PheML Stuttering GWAS.** Lead variant found 42kb 5' of *C5orf17* ( $\beta=0.701$ ;  $P=3.68 \times 10^{-6}$ ). Dashed line indicates genome-wide significance threshold ( $5.0 \times 10^{-8}$ ).



### PheML Predicted Developmental Stuttering GWAS - European Ancestry

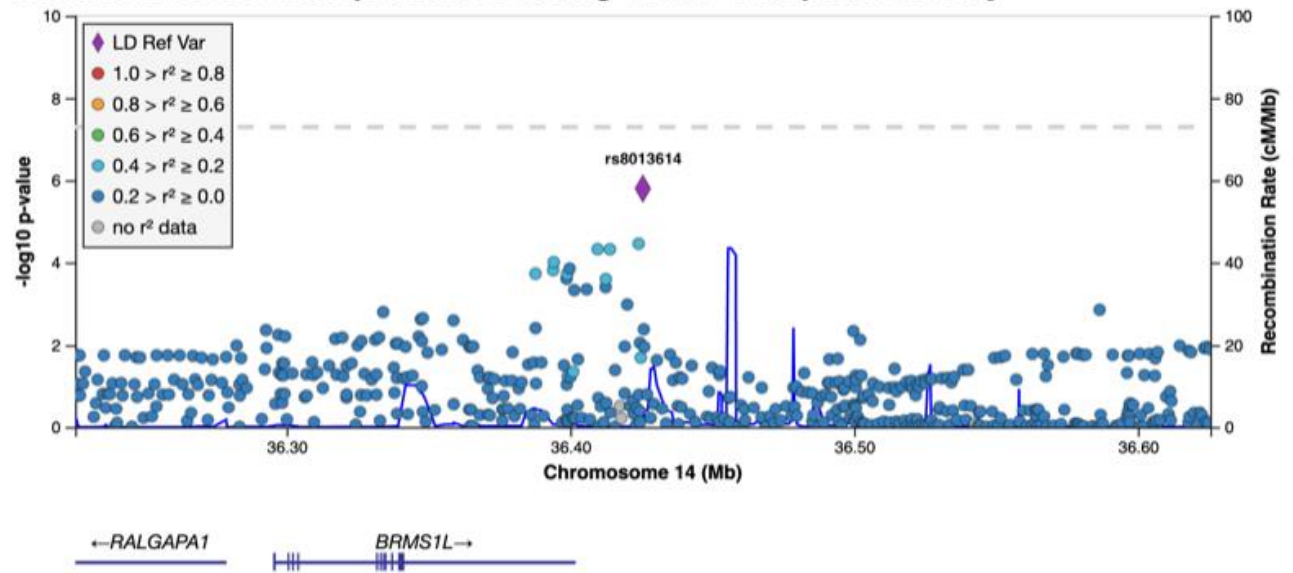

**Figure S12. LocusZoom Plot for rs8013614 in EUR PheML Stuttering GWAS.** Lead variant found 84kb 5' of *BRMS1L* (beta=-.120;  $P=1.59 \times 10^{-6}$ ). Dashed line indicates genome-wide significance threshold ( $5.0 \times 10^{-8}$ ).

### PheML Predicted Developmental Stuttering GWAS - Hispanic Ancestry

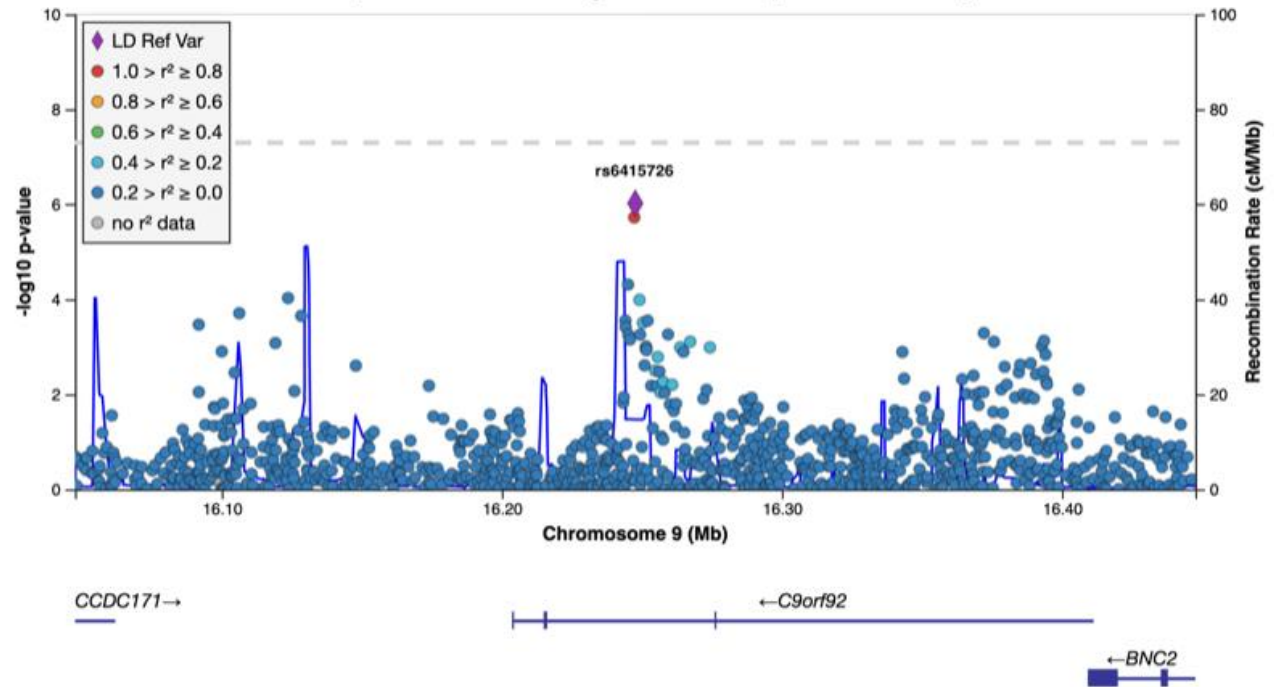

**Figure S13. LocusZoom Plot for rs6415726 in HIS PheML Stuttering GWAS.** Lead variant found within the second intron of *C9orf92* ( $\beta=0.730$ ;  $P=9.61 \times 10^{-6}$ ). Dashed line indicates genome-wide significance threshold ( $5.0 \times 10^{-8}$ ).

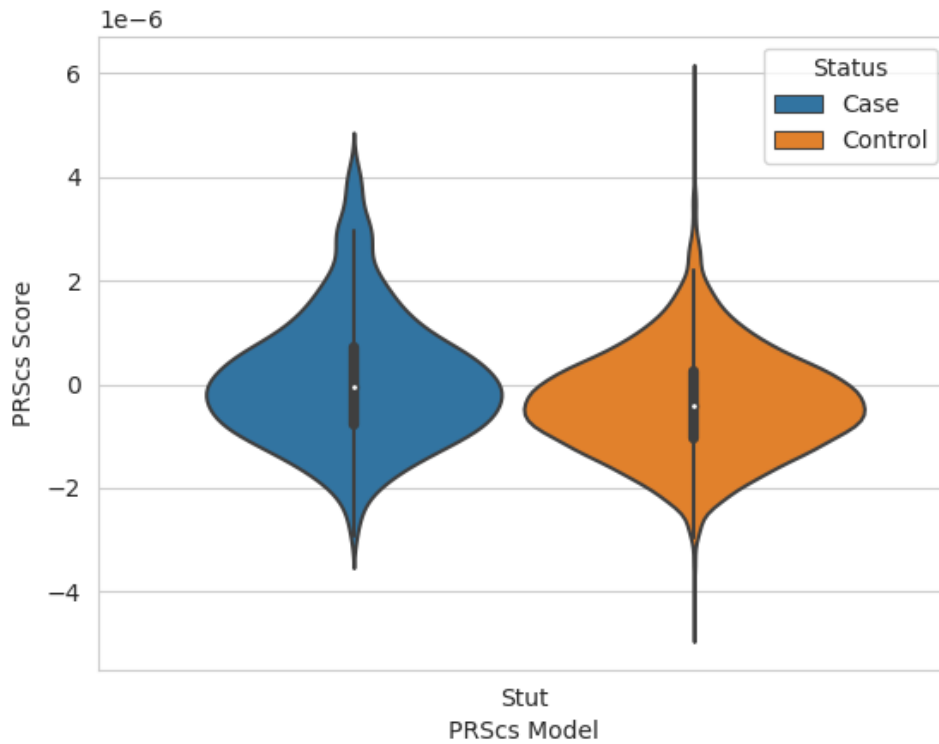

**Figure S14. Polygenic risk score violin plots.** PRS model was developed using the summary statistics from the EUR ancestry PheML stuttering GWAS. The International Stuttering Project stuttering case set (blue) scored significantly higher on the PRS model (mean= $8.56 \times 10^{-8}$ , SD= $1.13 \times 10^{-6}$ ) than their matched controls (orange), (mean= $-3.59 \times 10^{-7}$ , SD =  $1.01 \times 10^{-6}$ ;  $t(1131)=13.12$ ,  $P = 6.83 \times 10^{-39}$ ).

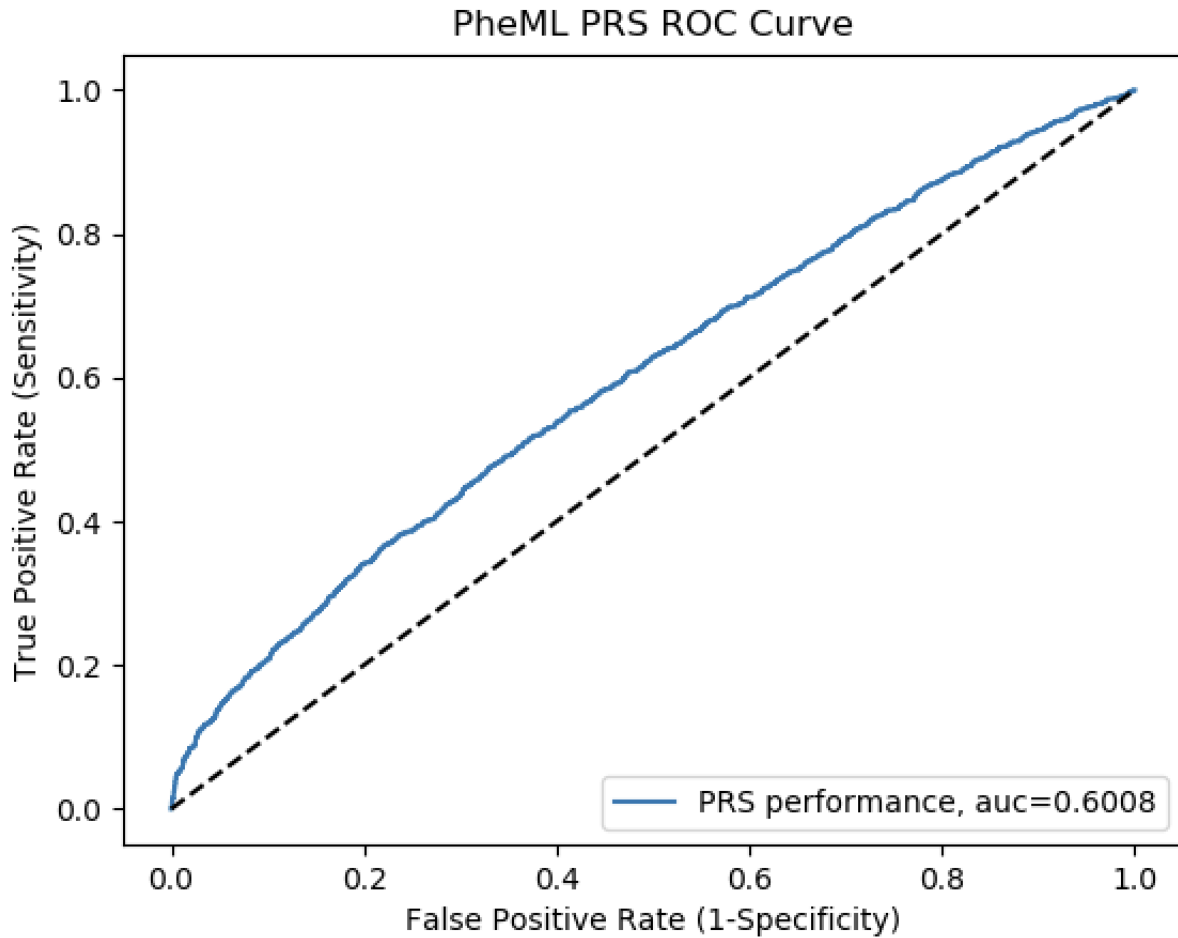

**Figure S15. Polygenic risk score receiver operating characteristic (ROC) curve.** PRS model was developed using the summary statistics from the EUR ancestry PheML stuttering GWAS. ROC curve plotted to demonstrate the model performance in predicting stuttering liability in the International Stuttering Project stuttering set. Area under the curve (AUC) = 0.60.

## Supplemental Tables

| Supplementary table S1. ICD codes used to identify developmental stuttering patients |             |                                                     |
|--------------------------------------------------------------------------------------|-------------|-----------------------------------------------------|
| ICD-9 Code                                                                           | ICD-10 Code | Definition                                          |
| 307.0                                                                                | F98.5       | Adult-Onset Fluency Disorder                        |
| 315.35                                                                               | F80.81      | Childhood Onset Fluency Disorder                    |
| 784.5                                                                                | R47.82      | Fluency Disorder in Conditions Classified Elsewhere |

**Table S1. ICD codes used to identify developmental stuttering.**

| Supplementary table S2. Demographics of clinically validated stuttering case and control set |                  |                     |
|----------------------------------------------------------------------------------------------|------------------|---------------------|
|                                                                                              | Stuttering Cases | Population Controls |
| Total                                                                                        | 1345             | 7019                |
| Male                                                                                         | 965 (71.7%)      | 4951 (70.5%)        |
| Female                                                                                       | 380 (28.3%)      | 2068 (29.5%)        |
| Ancestry                                                                                     |                  | n (%)               |
| European                                                                                     | 1132 (84.2%)     | 6111 (87.1%)        |
| African                                                                                      | 68 (5.1%)        | 400 (5.7%)          |
| East Asian                                                                                   | 42 (3.1%)        | 116 (1.7%)          |
| South Asian                                                                                  | 44 (3.3%)        | 148 (2.1%)          |
| Hispanic                                                                                     | 38 (2.8%)        | 132 (1.9%)          |
| Mixed/Other                                                                                  | 21 (1.5%)        | 112 (1.6%)          |

**Table S2. Demographic distribution for subjects used in genome-wide association analysis for the International Stuttering Project (ISP) stuttering sample set.**

*See attached table*

**Table S3. Suggestive hits from PheML predicted developmental stuttering GWAS run in each ancestry.** Table includes all variants where  $P < 5.0 \times 10^{-6}$ . We also report association results for each variant in alternative ancestries. GWAS results for European, African, Hispanic, South Asian, and East Asian ancestry cohorts denoted as EUR, AFR, HIS, SAS, and EAS respectively. GWAS results from clinically validated set denoted as CV.

*See attached table*

**Table S4. Replication results of previously identified genes associated with stuttering.**
